# Supplementary material for: Evolution of Recrystallized Grain and Texture of Cold-Drawn Pure Mg Wire and Their Effect on Mechanical Properties
Source: PubMed Central journal article supplement (PMC7014322; doi:10.3390/ma13020427), 2020-01-16
Supplement: materials-13-00427-s001.pdf [file materials-13-00427-s001.pdf]

1 **Evolution of recrystallized grain and texture of cold-**  
2 **drawn pure Mg wire and their effect on mechanical**  
3 **properties**

4 **Jiao Meng** <sup>1,2,a</sup>, **Liuxia Sun** <sup>3,a</sup>, **Yue Zhang** <sup>1,2</sup>, **Feng Xue** <sup>1,2,4</sup>, **Chenglin Chu** <sup>1,2</sup> and **Jing Bai** <sup>1,2,4,\*</sup>

5 <sup>1</sup> School of Materials Science and Engineering, Southeast University, Nanjing 211189, China;

6 joejoe1st@yeah.net (J.M.); zy\_seu@foxmail.com (Y.Z.); xuefeng@seu.edu.cn (F.X.); clchu@seu.edu.cn (C.C.)

7 <sup>2</sup> Jiangsu Key Laboratory for Advanced Metallic Materials, Southeast University, Nanjing 211189, China

8 <sup>3</sup> College of Arts and Sciences, Shanghai Dianji University, Shanghai 201306, China; spring3616@126.com

9 <sup>4</sup> Suzhou Institute of Biomedical Devices, Southeast University, Jiangsu 215000, China

10 <sup>a</sup> Jiao Meng and Liuxia Sun made equal contribution to this work

11 \* Correspondence: baijing@seu.edu.cn; Tel.: +86 25 52090689

12 Received: 16 December 2019; Accepted: 14 January 2020; **Published: date**

13  
14

## 15 Supplementary Figures

16 The tensile test was carried out on the Mg wires with the diameter of 1.5 mm. Figure S1 shows  
17 the strain-stress curves of Mg wires with different annealing treatments. The wires annealed at 150  
18 °C and 200 °C showed poor plasticity, although the yield strength were relatively high. The plasticity  
19 was obviously improved after annealed at 250 °C. However, with the holding time prolonged to 120  
20 min, there was an evident decline of yield strength. After annealed at 300 °C for 30 min, the wires  
21 obtained best plasticity, with no significant decrease of yield strength. With the further increase of  
22 temperature, both the plasticity and yield strength of Mg wires decreased.

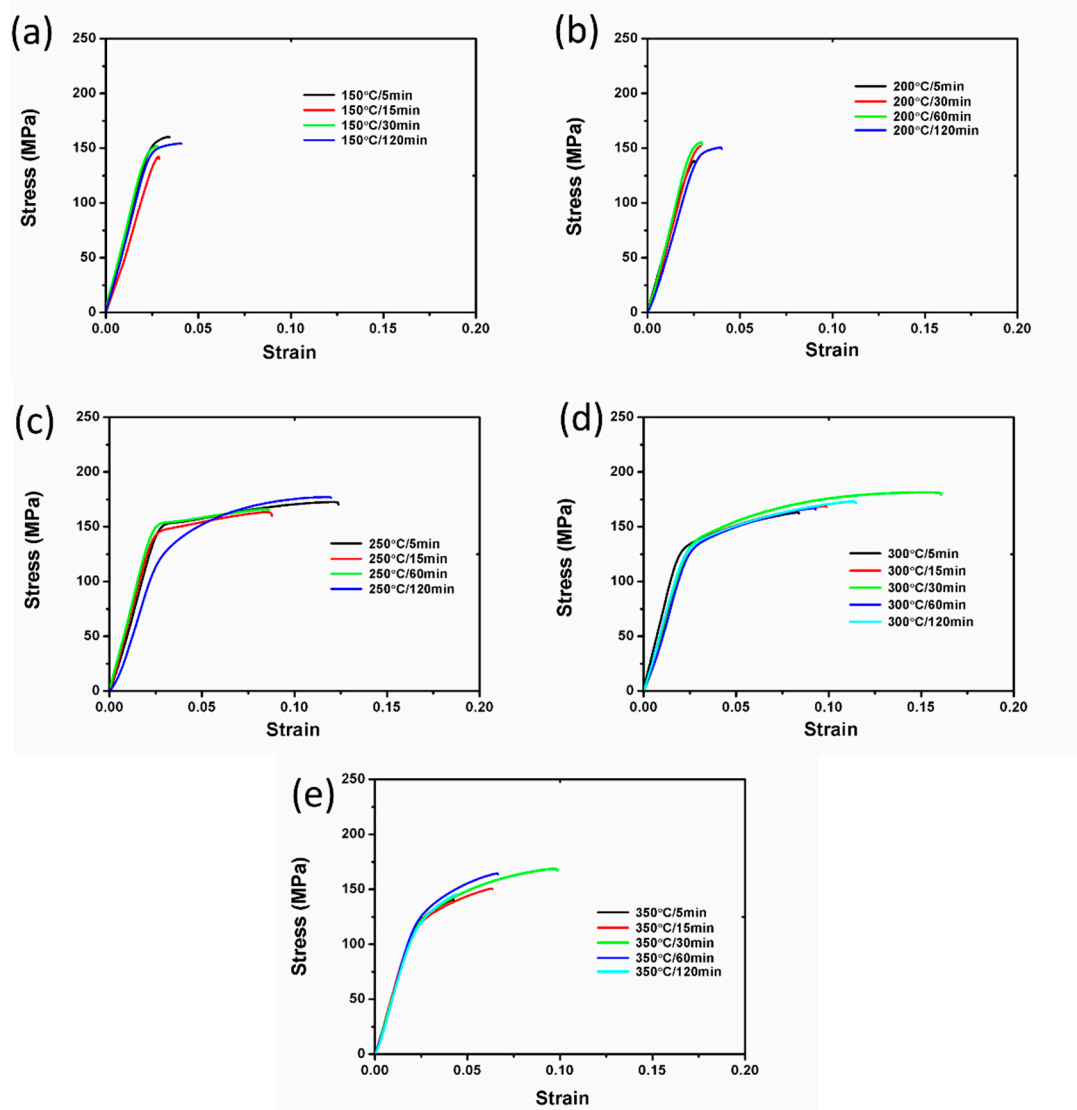

23

24 **Figure S1.** Strain-stress curves of Mg wires annealed at different temperature: (a) 150 °C; (b) 200 °C;

25 (c) 250 °C; (d) 300 °C; (e) 350 °C.

26

27

28

29

30

31

32

33 The mechanical properties of thinner annealed Mg wires were also tested. The results are listed  
 34 in Figure S2 and Table S1. The tested wires were firstly cold drawn with accumulated true strain of  
 35 138 %, and then annealed at 250 °C/5 min, 300 °C/30 min and 350 °C/120 min. Due to the different  
 36 diameters, the stress and strain values of the thinner (0.2 mm in diameter) Mg wires were different  
 37 from that of the thick wires to some extent. The thin wires annealed at 300 °C for 30 min exhibited  
 38 preferable integrated mechanical properties, especially the excellent plasticity. The results further  
 39 confirm that annealing treatment at 300 °C/30 min is appropriate for the improvement of mechanical  
 40 properties of cold drawn Mg wires.

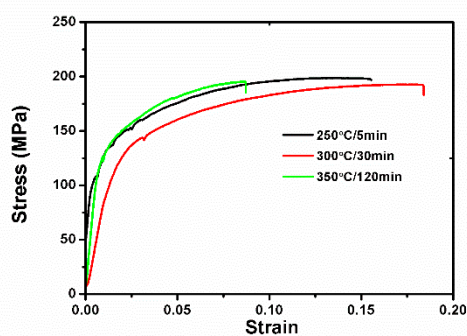

41

42 **Figure S2.** Strain-stress curves of thin Mg wires (0.2 mm in diameter) with true strain of 138% after  
 43 different annealing treatments.

44

45

**Table S1.** The statistic results of tensile test for thin Mg wires with diameter of 0.2 mm after different  
 annealing treatments.

| Annealing process | Ultimate strength(MPa) | Yield strength (MPa) | Elongation(%) |
|-------------------|------------------------|----------------------|---------------|
| 250 °C /5 min     | 199                    | 100                  | 13.3          |
| 300 °C/30 min     | 196                    | 96                   | 16.1          |
| 350 °C/120 min    | 195                    | 92                   | 9.1           |

46

47

48 The metallographic microstructures of Mg wires with the diameter of 1.5 mm annealed at 150  
49 °C, 200 °C, 250 °C, 300 °C and 350 °C for 15 min and 60 min are shown in Figure S3.

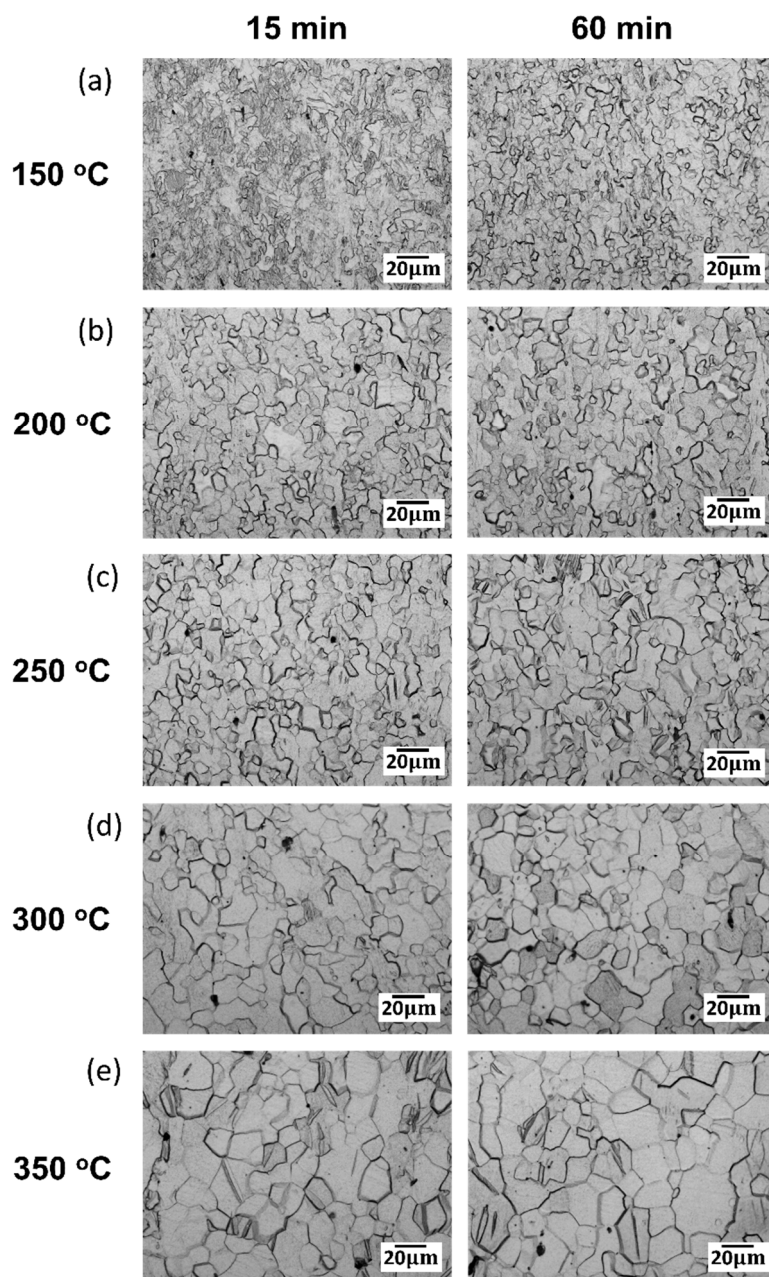

50

51 **Figure S3.** Annealed microstructures of pure Mg with different annealing process. (a) 150 °C; (b) 200  
52 °C; (c) 250 °C; (d) 300 °C; (e) 350 °C.

53
